# Supplementary material
Source: publisher figshare collection journal article supplement (https://sage.figshare.com/ndownloader/files/24689775)

# am
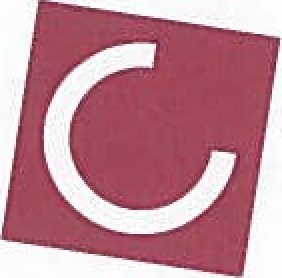


Academisch Medisch Centrum

| Aan mevrouw dr. J. Suurmond  Sociale Geneeskunde K2-207 | Universiteit van Amsterdam |
| --- | --- |
|  |  |
|  |  |
| Amsterdam, 10 augustus 2017 | Medisch Ethische Toetsingscommissie |
| uw kenmerk: | E-2-172 |
| ons kenmerk: W17 305 # 17.358 | doorkiesnummer: 566 7389 |

betreft:

Uw project: Waardigheid in de laatste levensfase voor patiënten van een niet-westerse herkomst en hun naasten

Geachte mevrouw Suurmond,

Uw brief d.d. 31 juli 2017 betreffende bovengenoemde studie is op 9 augustus jl. besproken in de vergadering van het dagelijks bestuur.

Het dagelijks bestuur is van oordeel dat bovengenoemde studie niet valt binnen de reikwijdte van de Wet medisch-wetenschappelijk onderzoek met mensen, aangezien er geen sprake is van wetenschappelijk onderzoek zoals bedoeld in artikel 1, eerste lid onder b van de WMO, alleen interviews worden afgenomen en wij geen aanleiding hebben te denken dat de psychische integriteit van de proefpersonen in het geding is.

Een formele beoordeling door onze commissie is derhalve niet noodzakelijk
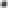


De commissie attendeert u op de volgende punten:

De commissie heeft alleen de WMO-plichtigheid beoordeeld. Er heeft verder geen inhoudelijke toets van het onderzoek plaatsgevonden. U en uw afdeling zijn verantwoordelijk voor de correcte uitvoering van het onderzoek volgens de geldende wet- en regelgeving. Hierbij vragen wij uw aandacht voor de belangrijkste regelgeving:

- Voor prospectief onderzoek, waarbij gegevens van proefpersonen worden verzameld en verwerkt, is toestemming van de proefpersonen nodig.
- Voor retrospectief onderzoek, waarbij gegevens van proefpersonen gecodeerd worden verzameld en verwerkt is in beginsel toestemming van de proefpersonen nodig. In artikel 458 van de WGBO is vastgelegd onder welke omstandigheden van het vragen van toestemming kan worden afgezien. Bij retrospectief anoniem onderzoek is toestemming niet verplicht, hierbij zijn de gegevens nooit meer herleidbaar tot de proefpersonen.

Dus ook niet via een code.

- Wanneer in een onderzoek gegevens worden verzameld van proefpersonen, dient hiermee correct te worden omgegaan zoals bepaald in de Gedragscode Gezondheidsonderzoek (Code Goed Gedrag), de Wet bescherming persoonsgegevens en, indien het onderzoek van het AMC betreft, de regels die binnen het AMC zijn vastgesteld, zoals de SOP "Reuse of care data for the purpose of research van de CRU

(http://intranet.amc.ni/web/orqanisatie/domeinen/research/clinical-research-unit-cru/cru-home/sops•dm.htm)

- Voorts dient u zich te houden aan de research code van het AMC en het VIJmc.

Meer informatie over bovengenoemde regelgeving kunt u vinden op internet, waaronder onze intranetpagina.

Deze opsomming betreft de belangrijkste regelgeving, maar is niet uitputtend. Mogelijk is nog andere wet- en regelgeving van toepassing op uw onderzoek.

Indien u twijfelt of door amendering of het toevoegen van addenda het onderzoek nog steeds buiten de reikwijdte van de WMO blijft kunt u dit aan de commissie ter beoordeling voorleggen.

Met vriendelijke groet, namens de Medisch Ethische Toetsingscommissie


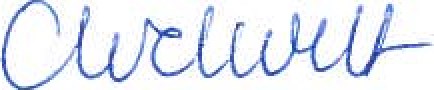


Mw. dr. C.L. van der Wilt ambtelijk secretaris

Bijlage: verklaring in het Engels

C.c. per email: m.torensma@amc.uva.nl; m.oosterveld@vumc.nl; x.devoogd@amc.uva.nl

# am
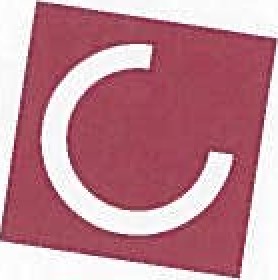


Academisch Medisch Centrum

Universiteit van Amsterdam

To whom it may concern,

Referring to our letter of August 10, 2017 (reference number W 17 305 # 17.358) we are pleased to confirm that the Medical Research Involving Human Subjects Act (WMO) does not apply to the above mentioned study and that an official approval of this study by our committee is not required.

Yours sincerely, on behalf of the Medical Ethics Review Committee of the Academic Medical Center,

Mrs. CL. van der Wilt, PhD secretary


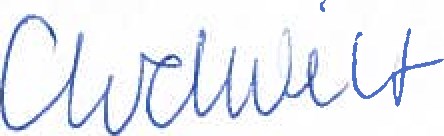

Supplement: Supplementary file 1 [file 24689775]
